# Supplementary material for: HaptGlove—Untethered Pneumatic Glove for Multimode Haptic Feedback in Reality–Virtuality Continuum
Source: PubMed Central journal article supplement (PMC10477838; doi:10.1002/advs.202301044), 2023-06-29
Supplement: ADVS-10-2301044-s002.pdf [file ADVS-10-2301044-s002.pdf]

## Supporting Information

for *Adv. Sci.*, DOI 10.1002/adv.202301044

HaptGlove—Untethered Pneumatic Glove for Multimode Haptic Feedback in Reality–Virtuality Continuum

*Jiaming Qi, Feng Gao, Guanghui Sun, Joo Chuan Yeo\* and Chwee Teck Lim\**

## Supporting Information

### **HaptGlove - Untethered pneumatic glove for multimode haptic feedback in reality-virtuality continuum**

*Jiaming Qi, Feng Gao, Guanghui Sun, Joo Chuan Yeo\*, Chwee Teck Lim\**

#### **This PDF file includes:**

Figure S1 to S11  
Table S1  
Movie S1 to S9

#### **Other Supplementary Materials for this manuscript include the following:**

Movie S1 to S9

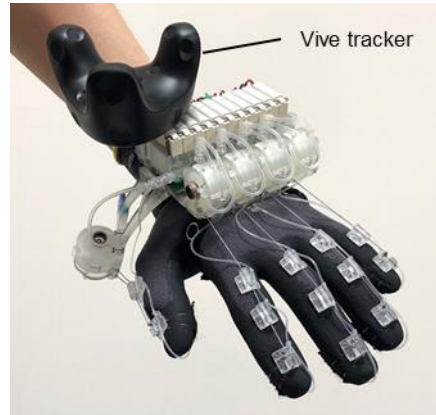

**Figure S1.** HaptGlove with Vive Tracker.

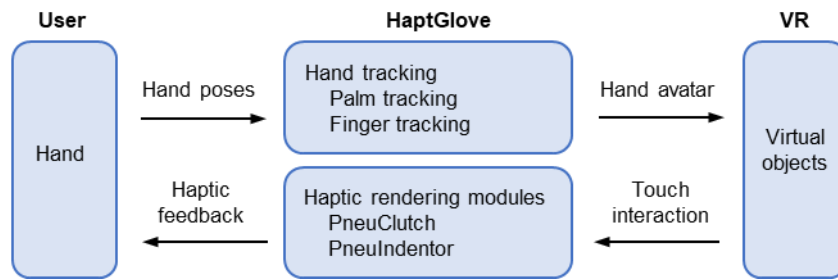

**Figure S2.** Workflow schematic of HaptGlove, indicating the interactions between virtual objects and corresponding haptic responses on the user’s hand. Briefly, the HaptGlove monitors user’s hand poses by palm and finger tracking using Vive tracker and rotational sensors, respectively. The information is mapped onto a hand avatar in VR. Information regarding touch interactions with virtual objects are sent back to HaptGlove to process, and the corresponding haptic rendering modules are activated to provide haptic feedback to the user.

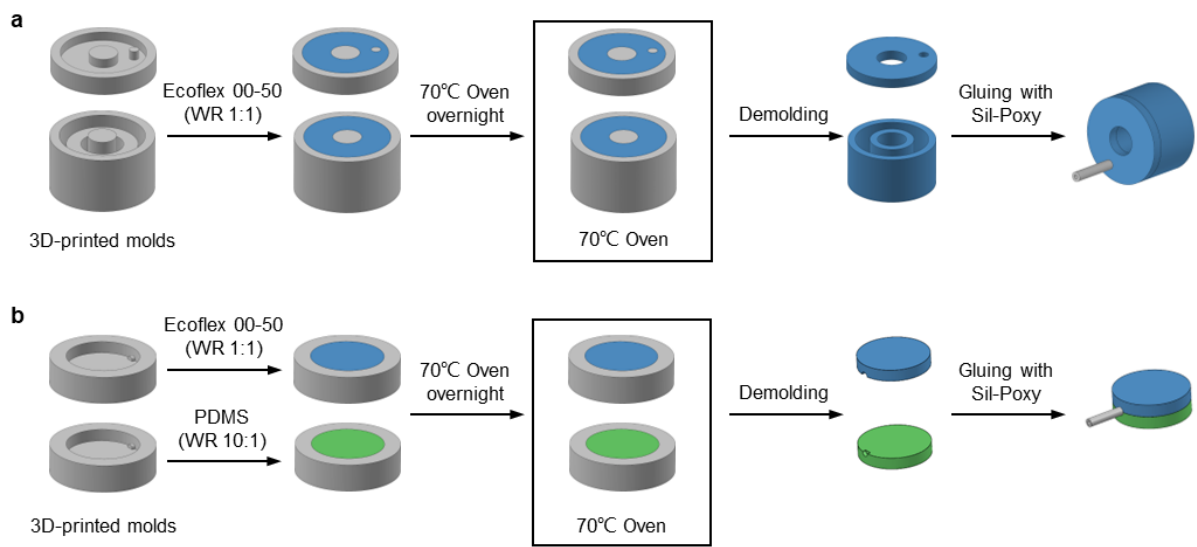

**Figure S3.** Soft actuator fabrication. (a) PneuClutch soft chamber fabrication. (b) PneuIndenter fabrication. WR stands for weight ratio.

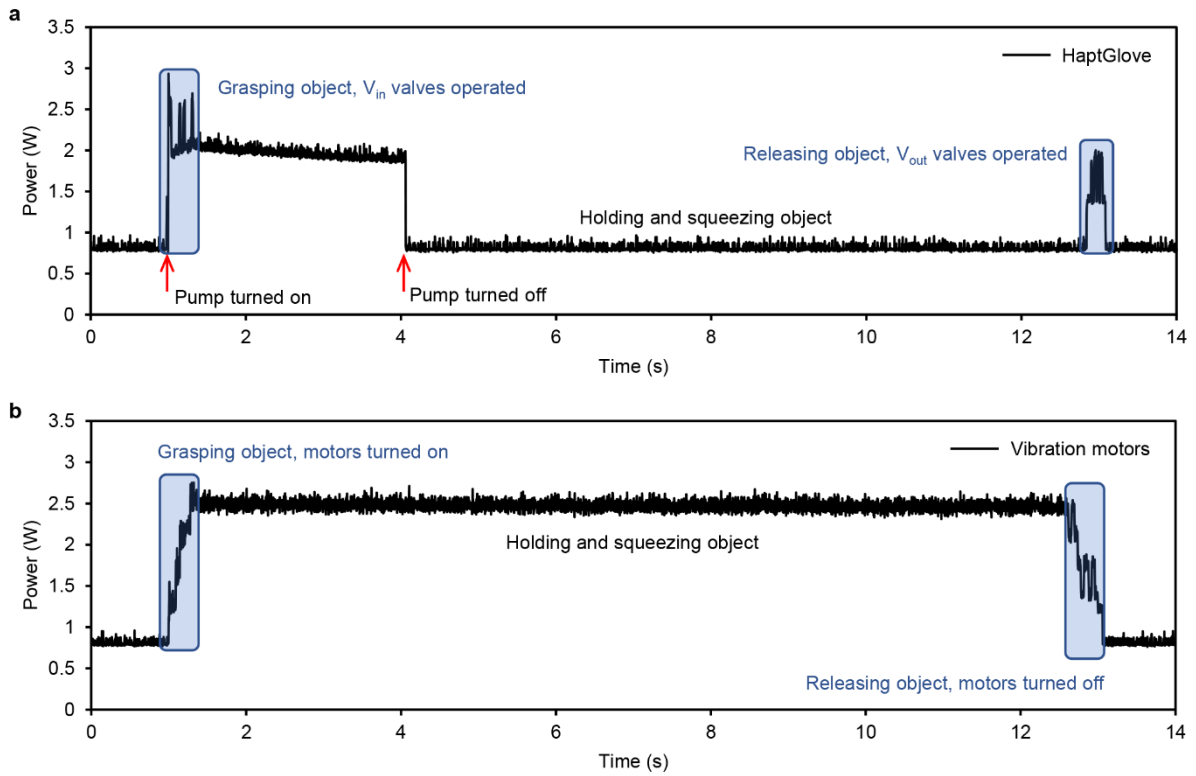

**Figure S4.** HaptGlove power consumption of grasping a virtual ball. (a) Multimode haptic feedback. When fingers touched virtual objects, corresponding valves operated to actuate the PneuClutches and PneuIndenters. At the same time, the pump was turned on to maintain the pressure in the reservoir. After these operations were done, the virtual ball can still be constantly felt in hand while the system power consumption was kept at a low level. The average power in this grasping event was 1.12 W. (b) Vibration haptic feedback using eccentric rotating mass (ERM) motors. The ERM motors need to be kept on to create a continuous grasping sensation. The average power was 2.43 W.

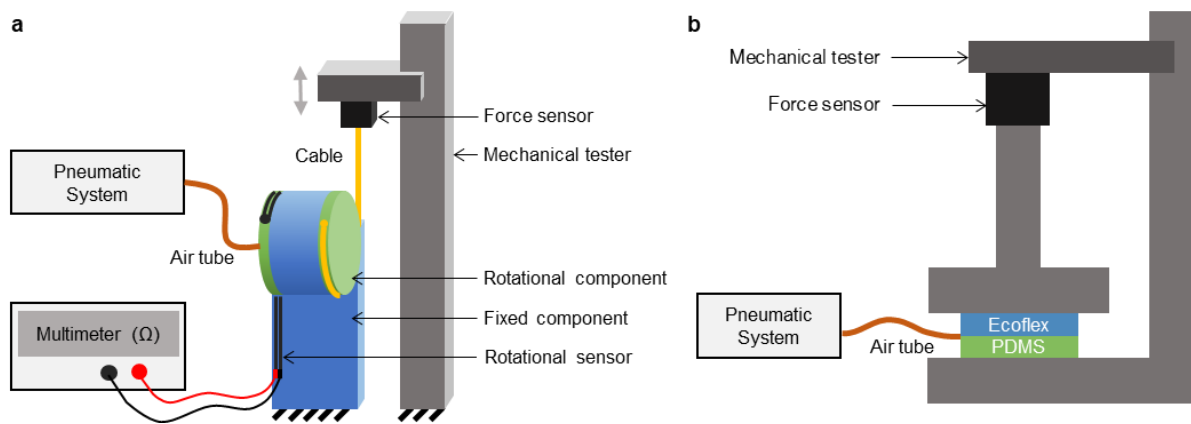

**Figure S5.** Testing setup of (a) PneuClutch and (b) PneuIndenter.

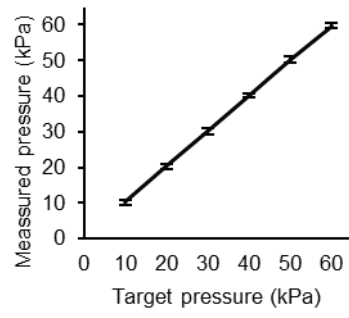

**Figure S6.** Pneumatic system pressure delivery test.



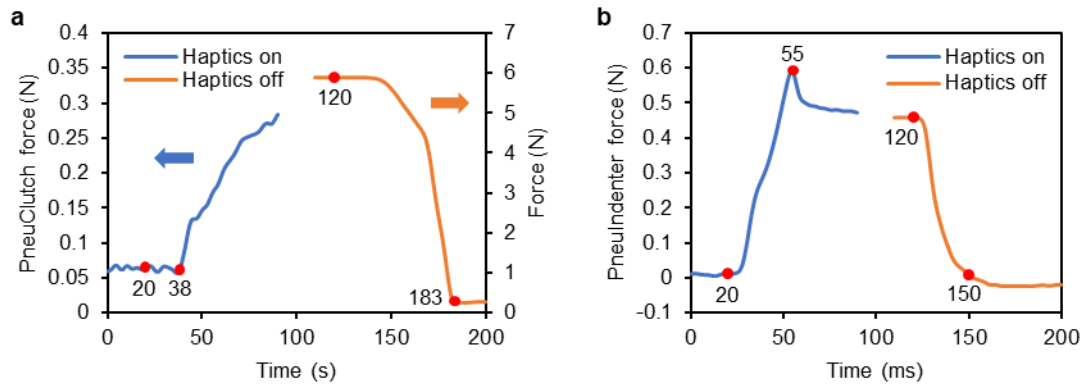

**Figure S7.** Force curves with 30kPa actuation showing the on and off delay of PneuClutch and PneuIndenter. For haptics on delay, because PneuClutch is a passive module, the delay starts when the  $V_{in}$  valve is powered and ends when the feedback force starts to increase. While PneuIndenter is an active device, the haptics on delay ends at the time when the force reached 95% of its peak value. The haptics off delay for both modules is between the time when  $V_{out}$  valve is powered to the time when the feedback force drops below 5%. (a) 18ms and 63ms were observed for haptics on and off delay of PneuClutch, respectively. (b) 35ms and 30ms were observed for haptics on and off delay of PneuIndenter, respectively.

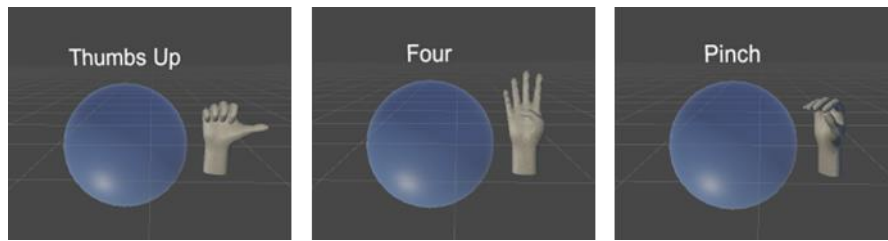

**Figure S8.** Three-step finger calibration. Users need to do “Thumbs Up”, “Four”, and “Pinch” poses one by one according to the hand models and touch the blue ball to confirm calibration.

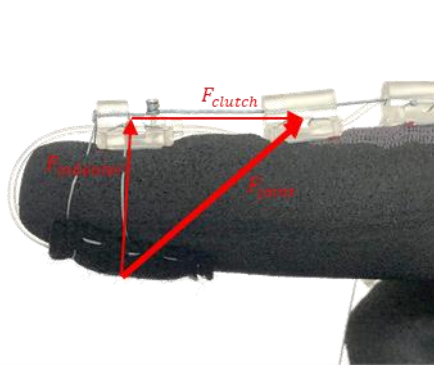

**Figure S9.** Joint force on fingertip.  $F_{joint} \approx \sqrt{F_{clutch}^2 + F_{indenter}^2}$

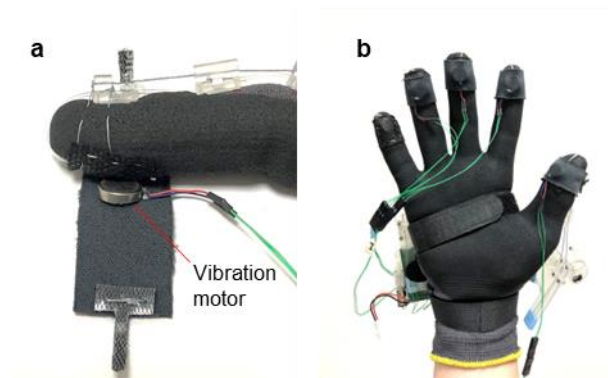

**Figure S10.** Vibration motors implementation. (a) Vibration motor placed beneath fingertip. (b) Vibration motors implementation for each glove.

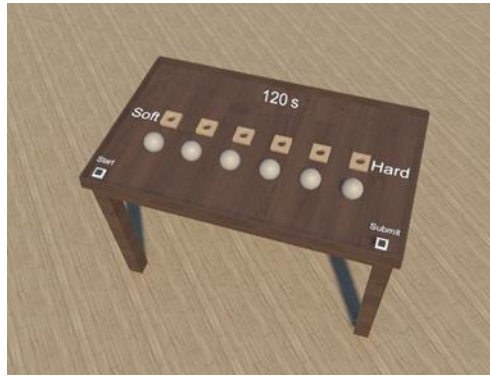

**Figure S11.** The VR scene of six-ball stiffness sorting.

Table S1. Comparison of commercial and published haptic gloves

| Ref.                          | Kinesthetic feedback |                |                    |           | Cutaneous feedback |                |             |              | Finger Tracking          | Haptic channels | Weight                 | Untethered |
|-------------------------------|----------------------|----------------|--------------------|-----------|--------------------|----------------|-------------|--------------|--------------------------|-----------------|------------------------|------------|
|                               | Actuation            | Variable force | Variable stiffness | Latency   | Actuation          | Variable force | Vibration   | Latency      |                          |                 |                        |            |
| <b>HaptGlove<sup>a</sup></b>  |                      |                |                    |           |                    |                |             |              |                          |                 |                        |            |
| Our work                      | Pneumatic            | Up to 17.13N   | Up to 1.92 N/mm    | 18ms      | Pneumatic          | Up to 1.5N     | Up to 160Hz | 18.8-155.9ms | Stretchable sensors      | 5               | 283g                   | Yes        |
| <b>Research prototypes</b>    |                      |                |                    |           |                    |                |             |              |                          |                 |                        |            |
| [1]                           | Pneumatic            | Up to 4N       | Up to 0.092N/mm    | 130ms     | n.a.               |                |             |              | n.d.                     | 5               | 245g <sup>b</sup>      | No         |
| [2]                           | Pneumatic            | Up to 3.5N     | Up to 0.47N/mm     | 200-300ms | n.a.               |                |             |              | n.a.                     | 5               | 45.6g <sup>b</sup>     | No         |
| [3]                           | n.a.                 |                |                    |           | Pneumatic          | 1N             | 10Hz        | 200ms        | Leapmotion sensor        | 3               | 3g/finger <sup>c</sup> | No         |
| [4]                           | Motor                | Up to 106N     | n.a.               | 21ms      | n.a.               |                |             |              | Time-of-Flight sensor    | 4               | 55g                    | Yes        |
| [5]                           | Motor                | Up to 3.34N    | Up to 0.26N/mm     | n.d.      | n.a.               |                |             |              | Hall sensors             | 3               | 488g                   | Yes        |
| [6]                           | Electrostatic        | Up to 50N      | Yes                | n.d.      | n.a.               |                |             |              | Leapmotion sensor        | 5               | 28g <sup>d</sup>       | No         |
| <b>Products in the market</b> |                      |                |                    |           |                    |                |             |              |                          |                 |                        |            |
| Meta glove <sup>[7]</sup>     | Pneumatic            | n.d.           | n.d.               | n.d.      | Pneumatic          | n.d.           | n.d.        | n.d.         | Camera-based tracking    | 5               | n.d.                   | No         |
| HaptX G1 <sup>[8]</sup>       | Pneumatic            | Up to 35.59N   | n.d.               | 23ms      | Pneumatic          | Up to 62kPa    | n.d.        | n.d.         | Magnetic motion tracking | 5               | 450g <sup>b</sup>      | No         |
| Dexmo <sup>[9]</sup>          | Motor                | Up to 500Nmm   | Yes                | n.d.      | n.a.               |                |             |              | Yes                      | 5               | 300g                   | Yes        |
| Manus Prime X <sup>[10]</sup> | n.a.                 |                |                    |           | Vibration          | n.a.           | Yes         | n.d.         | Flex sensors and IMU     | 5               | 70g                    | Yes        |

<sup>a</sup> 0-60kPa actuation pressure

<sup>b</sup> Exclude pneumatic control system

<sup>c</sup> 400g pneumatic control system

<sup>d</sup> Exclude control system

n.d. means not disclosed, n.a. means not applicable

**Movie S1.**

PneuClutch force feedback with variable actuation pressure.

**Movie S2.**

PneuIndenter activation with variable pressure and frequency.

**Movie S3.**

Picking up, manipulating and sensing shape and size of virtual objects.

**Movie S4.**

Sensing soft and hard objects.

**Movie S5.**

Sensing the heartbeat, raindrops and engine vibration.

**Movie S6.**

Pressing a button, and squeezing and bursting a balloon.

**Movie S7.**

Playing archery.

**Movie S8.**

Six-ball sorting experiment.

**Movie S9.**

Socializing with a friend.

## References

- [1] Y. Zheng, D. Wang, Z. Wang, Y. Zhang, Y. Zhang, W. Xu, *Engineering* **2018**, 4, 869.
- [2] Y. Zhang, D. Wang, Z. Wang, Y. Zhang, J. Xiao, *IEEE Trans Haptics* **2019**, 12, 269.
- [3] G. Frediani, F. Carpi, *Sci Rep* **2020**, 10, 1.
- [4] I. Choi, E. W. Hawkes, D. L. Christensen, C. J. Ploch, S. Follmer, in *IEEE International Conference on Intelligent Robots and Systems*, IEEE, **2016**, pp. 986–993.
- [5] Y. Park, I. Jo, J. Lee, J. Bae, *Mech Mach Theory* **2020**, 153.
- [6] R. J. Hinchet, H. Shea, *Advanced Intelligent Systems* **2022**, 2200174.
- [7] Inside Reality Labs Research: Bringing Touch to the Virtual World | Meta, <https://about.fb.com/news/2021/11/reality-labs-haptic-gloves-research/>, accessed: 05 **2023**.
- [8] HaptX. HaptX Glove., <https://haptx.com/>, accessed: 05 **2023**.
- [9] Dexta Robotics, <https://www.dextarobotics.com/>, accessed: 05 **2023**.
- [10] MANUS Prime X Haptic VR, <https://www.manus-meta.com/products/prime-x-haptic>, accessed: 05 **2023**.
